# Supplementary material
Source: Springer Nature journal article supplement (https://www.springermedizin.de/resource/supplementary/12967_2014_1908_MOESM3_ESM.pdf/9575118)

**A** CLL106 CLL cells stained with sera from vaccinated mice

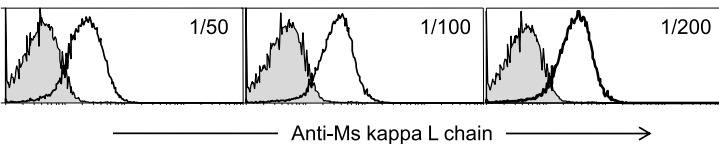

**B** CLL106      CLL103      CLL111      CLL107      CLL116

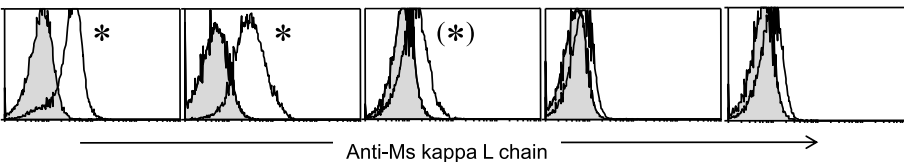

**C**

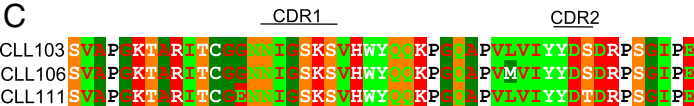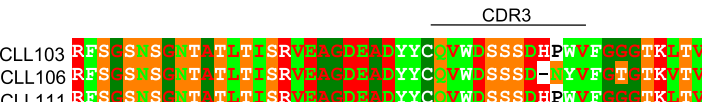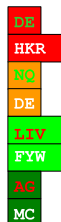

**D**

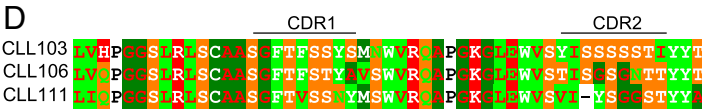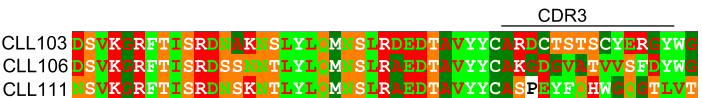

Supplement: MOESM3 [file 9575118]
